# Supplementary material for: The role of rhizobial (NifV) and plant (FEN1) homocitrate synthases in Aeschynomene/photosynthetic Bradyrhizobium symbiosis
Source: PubMed Central journal article supplement (PMC5428708; doi:10.1038/s41598-017-00559-0), 2017-03-27
Supplement: 41598_2017_559_MOESM1_ESM.pdf [file 41598_2017_559_MOESM1_ESM.pdf]

**The role of rhizobial (NifV) and plant (FEN1) homocitrate synthases in *Aeschynomene* /  
photosynthetic *Bradyrhizobium* symbiosis.**

Nico Nouwen, Jean-François Arrighi, Fabienne Cartieaux, Clémence Chaintreuil, Djamel  
Gully, Christophe Klopp and Eric Giraud

## Supplementary information

### Methods

#### Bacterial strains.

To construct a deletion of the *nifV* gene of *Bradyrhizobium* ORS285 by crossover PCR the following sets of primers were used. fur-*Xho*I:

5'           CTCGAGTCTCGCAGGCCACCATCTAC-3';           nifV-del-REV:           5'-  
CTTCGCGCCAGATGGATCCGAGCGTGGTGTTCGTTTCAGGATG-3'; nifV-del-FOR: 5'-  
GACACCACGCTCGGATCCATCTGGCGCGAAGTCTGTGAT-3' and cysE-rev: 5'-  
TTGGATGACGACCGAATTGG-3'. The resulting DNA fragment was cloned into pGEM®-  
T Easy (Promega) and transformed into thermocompetent *E.coli* XL2-Blue (Agilent  
Genomics) cells. Correct clones were verified by sequence analysis. For *nifV* deletion, the  
 $\Delta nifV$  fragment in pGEM®-T Easy was excised with *Apa*I - *Spe*I and ligated into the suicide  
vector pNPTS139<sup>1</sup> digested with *Apa*I – *Spe*I. The ligation mixture was transformed into  
*E.coli* XL2-Blue cells and correct clones were selected via kanamycin resistance (100 µg/ml;  
pNPTS139- $\Delta nifV$ ) and subsequent DNA restriction enzyme analysis. For mobilization into  
*Bradyrhizobium* ORS285<sup>2</sup>, plasmid pNPTS139- $\Delta nifV$ , which contains a counter selectable  
*sacB* marker, was transformed into CaCl<sub>2</sub> competent *E.coli* S17.1 cells. Conjugation, was  
performed using the biparental mating protocol as previously described<sup>3</sup>. The *nifV* deletion in  
sucrose resistant and kanamycin sensitive colonies was confirmed by PCR.

### ***In vitro* nitrogenase enzyme activity.**

Bacterial cultures grown in YM medium were washed with BNM medium and subsequently suspended in BNM-B medium containing 10 mM succinate (start optical density at 600 nm: ~ 0.12). This culture was used to inoculate 150 ml glass vials sealed with rubber septa (50 ml inoculum) or 9 ml vacuette® tubes (Greiner bio-one; ref:455001; 1 ml inoculum). To avoid overpressure, 15 ml / 0.9 ml of air was removed before injecting the same volume of 100% acetylene. The cultures were incubated at 28°C without shaking. In kinetic studies, at different times the absorbance (at 600 nm) of the bacterial culture was measured by taking aseptically a 1 ml sample. In addition, the amount of ethylene produced by the bacterial culture was measured by injecting 1 ml gas sample into a gas chromatograph. For complementation studies, homocitrate (Sigma-Aldrich; 10 mM final concentration) was added to the growth medium.

### **Molecular methods and sequence analysis.**

*FEN1* was identified in the *A. evenia* (CIAT22838) genome (J. F. Arrighi, unpublished) by Blast search using the *FEN1* sequence of *L. japonicus* as query. Using the *A. evenia FEN1* genomic sequence, primers were designed to amplify the first exon of all *FEN1* orthologs in *A. afraspera*. FEN1-F3 : 5'-CCCACACTACATTCCCAACC-3' and FEN1-R1 : 5'-GCAGCATCTTCAGGGACAA-3' (A1; A2) and primers FEN1-F3 : 5'-CCCACACTACATTCCCAACC-3' and FEN1-R2 : 5'-ATCATCGCAACCAAGACTCC-3' (B1; B2). PCR amplifications, cloning and sequencing of PCR products were performed as described in <sup>45</sup>. The generated DNA sequences are deposited in Genbank under accession numbers KY412792 – KY412794. To identify the complete coding sequence of *A. afraspera* (LSTM #1) and *A. evenia var. evenia* (PI 225551) *FEN1* orthologs, the sequence obtained for

the first exon and *A. evenia* (CIAT22838) *FEN1* genomic sequence, respectively, were used as query in a BLAST search in *A. afraspera* and *A. evenia var evenia* transcriptomes (<sup>6</sup>; unpublished results). To identify in the transcriptomes genes encoding isopropylmalate synthases (IPMS), the sequence of *L. japonicus* IPMS (Lj5g3v2298240) was used as query in a BLAST search.

## References

1. Fischer, B., Rummel, G., Aldridge, P. & Jenal, U. The FtsH protease is involved in development, stress response and heat shock control in *Caulobacter crescentus*. *Mol. Microbiol.* **44**, 461–478 (2002).
2. Molouba, F. *et al.* Photosynthetic bradyrhizobia from *Aeschynomene* spp. are specific to stem-nodulated species and form a separate 16S ribosomal DNA restriction fragment length polymorphism group. *Appl. Environ. Microbiol.* **65**, 3084–94 (1999).
3. Podlešáková, K. *et al.* Rhizobial synthesized cytokinins contribute to but are not essential for the symbiotic interaction between photosynthetic bradyrhizobia and *Aeschynomene* legumes. *Mol. Plant-Microbe Interact.* **26**, 1232–1238 (2013).
4. Arrighi, J.-F. *et al.* Genotype delimitation in the Nod-independent model legume *Aeschynomene evenia*. *PLoS One* **8**, e63836 (2013).
5. Arrighi, J.-F. *et al.* Radiation of the Nod-independent *Aeschynomene* relies on multiple allopolyploid speciation events. *New Phytol.* **201**, 1457–1468 (2014).
6. Czernic, P. *et al.* Convergent evolution of endosymbiont differentiation in Dalbergioid and Inverted Repeat-Lacking Clade legumes mediated by nodule-specific cysteine-rich peptides. *Plant Physiol.* **169**, 1254–1265 (2015).



**Table S1.** Gene products annotated as homocitrate synthase in rhizobial genomes that are present in the genome portal of the U.S. Department of Energy Joint Genome Institute (DOE JGI). The rhizobial genomic database was searched with homocitrate synthase as keyword. As homocitrate synthases belong to the same enzyme family as isopropyl malate synthases, strains in which the gene product was annotated as putative alpha-isopropylmalate / homocitrate synthase family protein were omitted from the table. In addition, for the rhizobial strains containing a gene product annotated as homocitrate synthase it was verified that they contained at least one other gene of which the product had been annotated as alpha-isopropylmalate (/homocitrate synthase) family protein.

| Genome                                          | Locus Tag              | Gene Product Name             |
|-------------------------------------------------|------------------------|-------------------------------|
| <i>Azorhizobium caulinodans</i> ORS571          | AZC_3389               | putative homocitrate synthase |
| <i>Azorhizobium doebereineriae</i> UFLA1-100    | YU1DRAFT_01815         | homocitrate synthase NifV     |
| <i>Bradyrhizobium elkanii</i> 587               | BELKANIIDRAFT_04289    | homocitrate synthase NifV     |
| <i>Bradyrhizobium elkanii</i> USDA76            | BraeIDRAFT_3014        | homocitrate synthase NifV     |
| <i>Bradyrhizobium elkanii</i> USDA 94           | A3AKDRAFT_06922        | homocitrate synthase NifV     |
| <i>Bradyrhizobium elkanii</i> USDA 3259         | YUGDRAFT_06316         | homocitrate synthase NifV     |
| <i>Bradyrhizobium elkanii</i> WSM2783           | YY7DRAFT_09596         | homocitrate synthase NifV     |
| <i>Bradyrhizobium elkanii</i> WSM1741           | YUODRAFT_06272         | homocitrate synthase NifV     |
| <i>Bradyrhizobium elkanii</i> USDA 3254         | A3AMDRAFT_07009        | homocitrate synthase NifV     |
| <i>Bradyrhizobium</i> genosp. SA-4 CB756        | BraeDRAFT_6259         | homocitrate synthase NifV     |
| <i>Bradyrhizobium japonicum</i> 22              | K410DRAFT_4369         | homocitrate synthase NifV     |
| <i>Bradyrhizobium</i> sp. Ai1a-2                | K288DRAFT_07984        | homocitrate synthase NifV     |
| <i>Bradyrhizobium</i> sp. ARR65                 | BraARR65DRAFT_00070590 | homocitrate synthase NifV     |
| <i>Bradyrhizobium</i> sp. BTai1                 | BBta_5875              | homocitrate synthase NifV     |
| <i>Bradyrhizobium</i> sp. CCGE-LA001            | BCCGELA001_11941       | homocitrate synthase          |
| <i>Bradyrhizobium</i> sp. Cp5.3                 | K289DRAFT_07402        | homocitrate synthase NifV     |
| <i>Bradyrhizobium</i> sp. DOA9                  | BDOA9DRAFT_06234       | homocitrate synthase NifV     |
| <i>Bradyrhizobium</i> sp. EC3.3                 | YUUDRAFT_06493         | homocitrate synthase NifV     |
| <i>Bradyrhizobium</i> sp. ORS278                | BRADO5390              | homocitrate synthase NifV     |
| <i>Bradyrhizobium</i> sp. S23321                | S23_45990              | putative homocitrate synthase |
| <i>Bradyrhizobium</i> sp. TV2a.2                | A3AIDRAFT_07842        | homocitrate synthase NifV     |
| <i>Bradyrhizobium</i> sp. USDA 3384             | A3CKDRAFT_07072        | homocitrate synthase NifV     |
| <i>Bradyrhizobium</i> sp. WSM1743               | YU9DRAFT_00569         | homocitrate synthase NifV     |
| <i>Bradyrhizobium</i> sp. WSM2254               | A3M7DRAFT_05034        | homocitrate synthase NifV     |
| <i>Bradyrhizobium</i> sp. WSM2793               | A3ASDRAFT_06087        | homocitrate synthase NifV     |
| <i>Bradyrhizobium</i> sp. WSM3983               | YUADRAFT_06708         | homocitrate synthase NifV     |
| <i>Bradyrhizobium</i> sp. WSM3983               | YUADRAFT_07328         | homocitrate synthase NifV     |
| <i>Mesorhizobium amorphae</i> CCNWGS0123        | MEA186_26726           | homocitrate synthase          |
| <i>Mesorhizobium</i> sp. WSM3224                | YU3DRAFT_05384         | homocitrate synthase NifV     |
| <i>Rhizobium selenitireducens</i> ATCC BAA-1503 | L867DRAFT_04253        | homocitrate synthase NifV     |

**Table S2.** Accessions and origin of *Aeschynomene* spp. used in this study.

| <i>Aeschynomene</i> species         | Accession                 | LSTM code | Origin    |
|-------------------------------------|---------------------------|-----------|-----------|
| <b>NF-dependent species</b>         |                           |           |           |
| <i>A. afraspera</i>                 | LSTM #1                   | 1         | Senegal   |
| <i>A. nilotica</i>                  | IRRI 014040               | 53        | Senegal   |
| <b>NF-independent species</b>       |                           |           |           |
| <i>A. evenia</i>                    | CIAT22838                 | 76        | Malawi    |
| <i>A. evenia</i> var. <i>evenia</i> | PI 225551                 | 21        | Zambia    |
| <i>A. indica</i>                    | LSTM #19                  | 19        | Senegal   |
| <i>A. scabra</i>                    | LSTM #26                  | 26        | Mexico    |
| <i>A. sensitiva</i>                 | LSTM #28                  | 28        | Senegal   |
| <i>A. deamii</i>                    | LSTM #24                  | 24        | Mexico    |
| <i>A. denticulata</i>               | IRRI 013003               | 50        | Brazil    |
| <i>A. virginica</i>                 | Essex Co. Virginia<br>#42 | 63        | USA       |
| <i>A. tambacoudensis</i>            | LSTM #60                  | 60        | Senegal   |
| <i>A. pratensis</i>                 | IRRI 013006               | 55        | Brazil    |
| <i>A. selloi</i>                    | CPI 104040                | 186       | Argentina |

**Table S3.** List of primers used in this study for RT-qPCR experiments. The same primer pair designed for EF1 $\alpha$  is used for *A. evenia* and *A. afraspera*.

| <b>Gene</b>                   | <b>Forward primer</b>         | <b>Reverse primer</b>        |
|-------------------------------|-------------------------------|------------------------------|
| <i>EF1<math>\alpha</math></i> | AATGGTGATGCTGGTATGGTTAA<br>G  | TCTTCTTCTGTGCTGCCTTGG        |
| <i>AeFEN1_21</i>              | TTGGTTCAGGATCAGTGGATTCA<br>G  | TGGCAATCTCATCAACACCTTCT      |
| <i>AaFEN1_A1</i>              | ACTATGTCGGTGATGATGGCTAT<br>A  | CCTCCTTCGTCTTCTTCAACTTG      |
| <i>AaFEN1_A2</i>              | GGAGCATAAGTTGAAGAAGACGA<br>AA | ACAAACTGAACATCATCGCATC<br>CC |
| <i>AaFEN1_B1</i>              | AGAAGCTCGACATCGCACGC          | AACAGGAACATAACCATCAACA<br>CC |
| <i>AaFEN1_B2</i>              | AGGAGTCTTGGTTGCGATGATG        | ATGCCAACAGTGTCAGGTATAT<br>CC |



**Table S4.** Genbank number or Gene\_ID for sequences used in the phylogenetic analysis.

| <b>Species</b>       | <b>accession:</b> | <b><i>FENI</i></b> | <b><i>IPMS</i></b> |
|----------------------|-------------------|--------------------|--------------------|
| <i>A. evenia</i>     | CIAT22838         | KY412790           | KY618805           |
|                      | PI 225551         | KY412797           | KY618806           |
|                      |                   |                    |                    |
| <i>A. afraspera</i>  | LSTM1             | A1: KY412795       | A: KY618807        |
|                      |                   | A2: KY412798       | B: KY618808        |
|                      |                   | B1: KY412799       |                    |
|                      |                   | B2: KY412796       |                    |
|                      |                   |                    |                    |
| <i>L. japonicus</i>  | MG-20             | Lj1g3v3690020      | Lj5g3v2298240      |
|                      |                   | bis: Lj1g3v3690180 |                    |
|                      |                   |                    |                    |
| <i>G. max</i>        | William 82        | A: Glyma.19g120400 | A: Glyma.20G245300 |
|                      |                   | B: Glyma.19g120600 | B: Glyma.10G295400 |
|                      |                   | C: Glyma.03g005700 |                    |
|                      |                   |                    |                    |
| <i>M. truncatula</i> | A17               |                    | Medtr1g116500      |
|                      |                   |                    |                    |
| <i>Cucumis</i>       | Gy14              |                    | LOC101205698       |
|                      |                   |                    |                    |

## SI Figure legends

**Fig. S1.** *Bradyrhizobium* ORS285 *nifV* is localized in a genomic region containing other *nif* genes. Schematic overview of the genomic region surrounding the *nifV* gene. *irr*: putative iron response regulator

**Fig. S2.** Homocitrate addition to the culture medium or re-introducing *nifV* on a plasmid results in the loss of “ethane” production by ORS285  $\Delta nifV$  cells in the acetylene reduction assay. (A) chromatogram of gas-samples taken from ORS285  $\Delta nifV$  cells grown for 7 days in vacuette® tubes containing BNM-B medium and 10% acetylene gas in the absence (solid line) or presence (dashed line) of 10 mM homocitrate. (B) Chromatogram of gas-samples taken from ORS285  $\Delta nifV$  cells that do not (solid line) or do (dashed line) contain a plasmid containing *nifV* and which are grown for 7 days in vacuette® tubes containing BNM-B medium and 10% acetylene gas.

**Fig. S3.** *A. evenia* and *A. nilotica* plants that are inoculated with the *Bradyrhizobium* ORS285  $\Delta nifV$  strain produce “ethane” in the acetylene reduction assay. Chromatograms of gas-samples taken from (A) *A. evenia*, (B) *A. afraspera* and (C) *A. nilotica* plants inoculated with the WT (black line) or  $\Delta nifV$  mutant (red line) at 22 / 28 dpi and incubated for 2 hours in the presence of 10% acetylene.

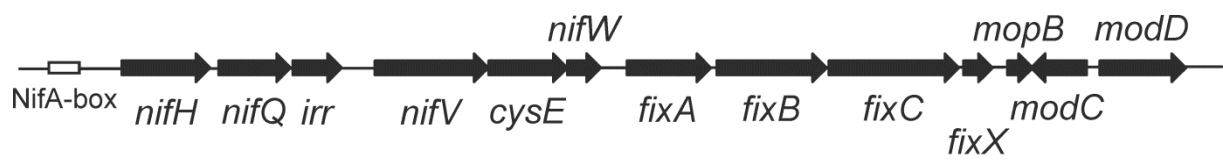

Figure S1

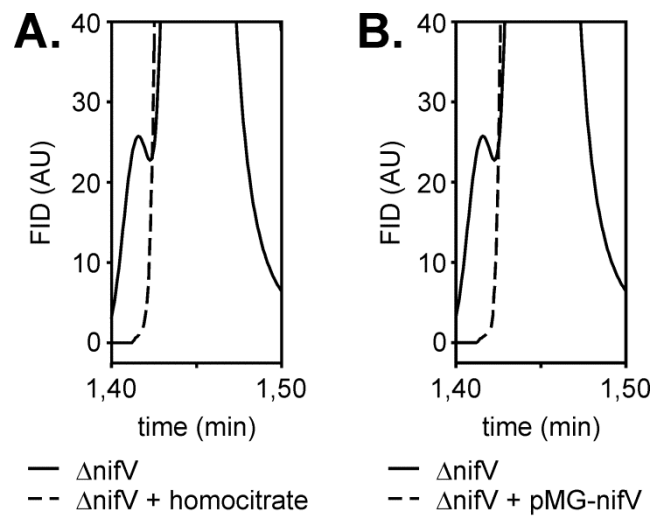

Figure S2

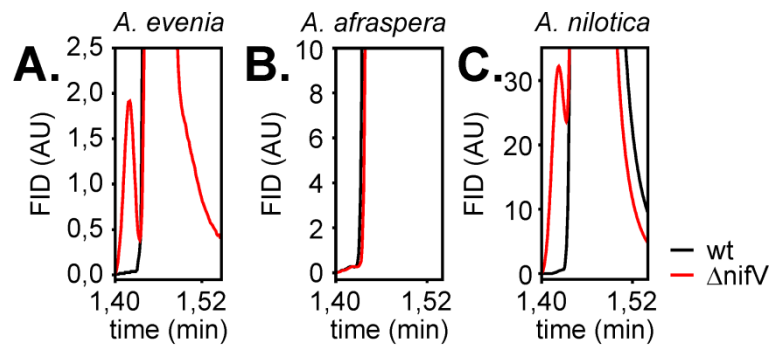

Figure S3
